# Supplementary material
Source: Springer Nature journal article supplement (https://www.springermedizin.de/resource/supplementary/12879_2010_1273_MOESM3_ESM.pdf/9442236)
Supplement: MOESM3 [file 9442236]

## CHLAMYDIA SCREENING

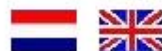

Welcome to the chlamydia screening programme website. Internet-based chlamydia screening is a three-year large-scale programme for 16-29 year-olds. It is organised by the Municipal Health Services in Amsterdam, Rotterdam and the eastern part of the Dutch province of South-Limburg. All men and women aged 16-29 who are registered at local councils or doctors' (GP) surgeries in these areas will be invited to take part in the screening. The letter they receive contains a personal code to log in on the website. There, the screening is explained and a chlamydia test kit can be ordered. This website is in Dutch, but perhaps someone can help you with that. If you cannot participate in the screening because of language problems and you do have symptoms of chlamydia as described below, go and see your GP.

**About chlamydia** Chlamydia is the most common sexually transmitted infection (STI) in the Netherlands. Every year about 60,000 new infections are found. You can catch it by having unsafe sex, which allows the chlamydia bacteria to get

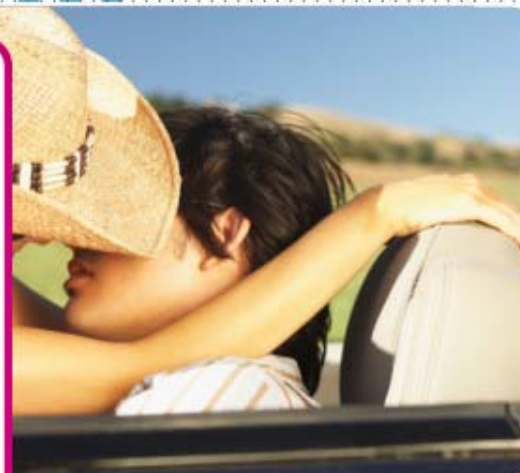

LOG IN

Chlamydia Screening is een samenwerkingsverband van Soa Aids Nederland, GGD Amsterdam, GGD Rotterdam-Rijnmond, GGD Zuid Limburg en het Rijksinstituut voor Volksgezondheid en Milieu (RIVM)
